# Supplementary material for: Low-temperature etch synthesis of Fe-doped Ni(OH)2 for enhanced bifunctional water splitting
Source: Royal Society of Chemistry journal article supplement (doi:10.1039/d4se01712a), 2025-01-01
Supplement: d4se01712a1.pdf [file d4se01712a1.pdf]

## Supplementary material

### Low-Temperature Etch Synthesis of Fe-Doped Ni(OH)<sub>2</sub> for Enhanced Bifunctional Water Splitting

Yanmei Xin,<sup>1</sup> Xiaoru Dou,<sup>1</sup> Qiling Yan,<sup>1</sup> Ruiting Zhang,<sup>1</sup> Shuaishuai Li,<sup>2,\*</sup> Guoan Huang,<sup>3,\*</sup> Zhonghai Zhang<sup>4,\*</sup>

<sup>1</sup> Institute of Bismuth Science, School of Materials and Chemistry, University of Shanghai for Science and Technology, 334 Jungong Road, Shanghai 200093, China

<sup>2</sup> School of Medical Instruments, Shanghai University of Medicine and Health Sciences, Shanghai 201318, China

<sup>3</sup> No.2 High School of East China Normal University, 555 Chenhui Road, Zhangjiang Pudong, Shanghai, China

<sup>4</sup> School of Chemistry and Molecular Engineering, East China Normal University, 500 Dongchuan Road, Shanghai 200241, China

\*E-mail: [yanmeixin@usst.edu.cn](mailto:yanmeixin@usst.edu.cn); [liss@sumhs.edu.cn](mailto:liss@sumhs.edu.cn); [guoanhuang3550@126.com](mailto:guoanhuang3550@126.com); [zhzhang@chem.ecnu.edu.cn](mailto:zhzhang@chem.ecnu.edu.cn);

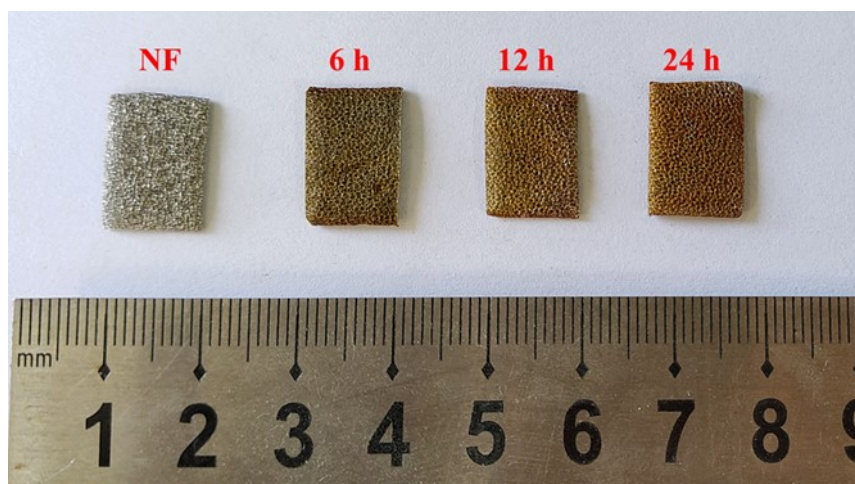

**Fig. S1** Photographs of NF and Fe-Ni(OH)<sub>2</sub>/NF catalysts with different etching time.

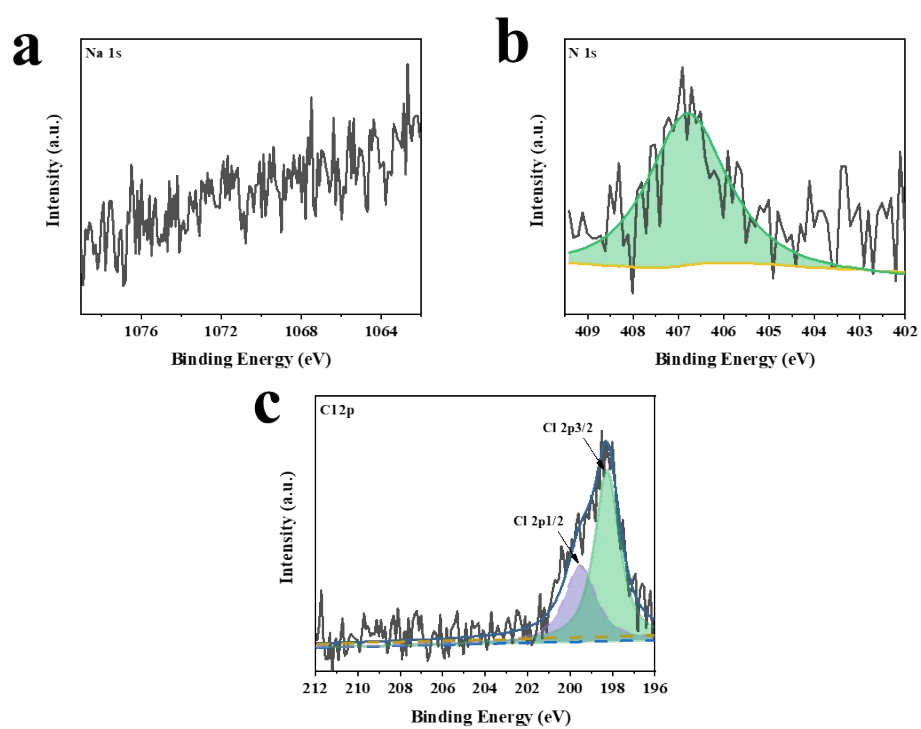

**Fig. S2** High-resolution XPS spectra of (a) Na 1s, (b) N 1s, and (c) Cl 2p.

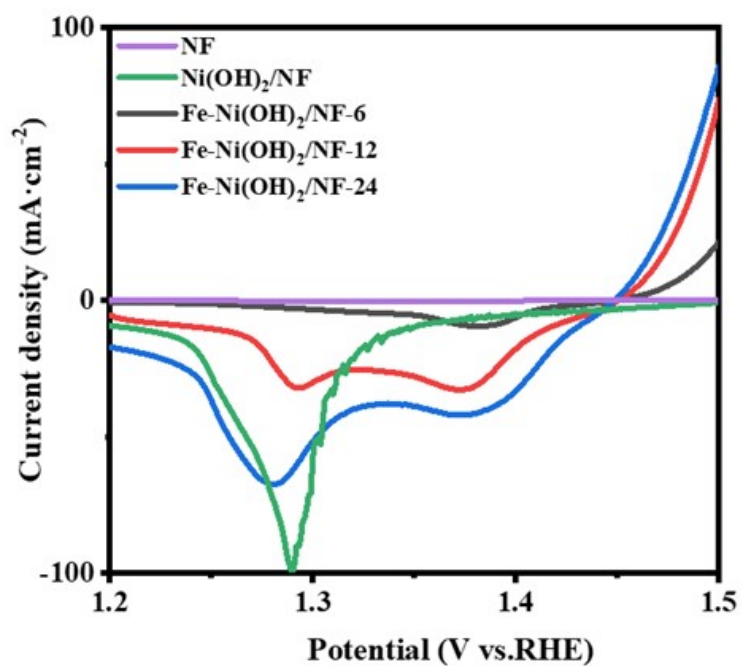

**Fig. S3** The zoomed-in plots of LSV.

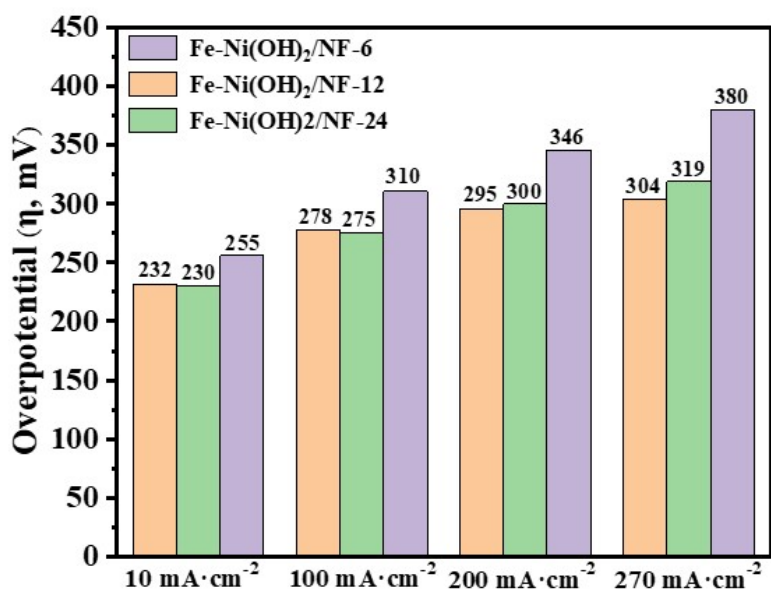

**Fig. S4** Comparison plots of overpotential for OER at  $10 \text{ mA}\cdot\text{cm}^{-2}$ ,  $100 \text{ mA}\cdot\text{cm}^{-2}$ ,  $200 \text{ mA}\cdot\text{cm}^{-2}$  and  $270 \text{ mA}\cdot\text{cm}^{-2}$ .

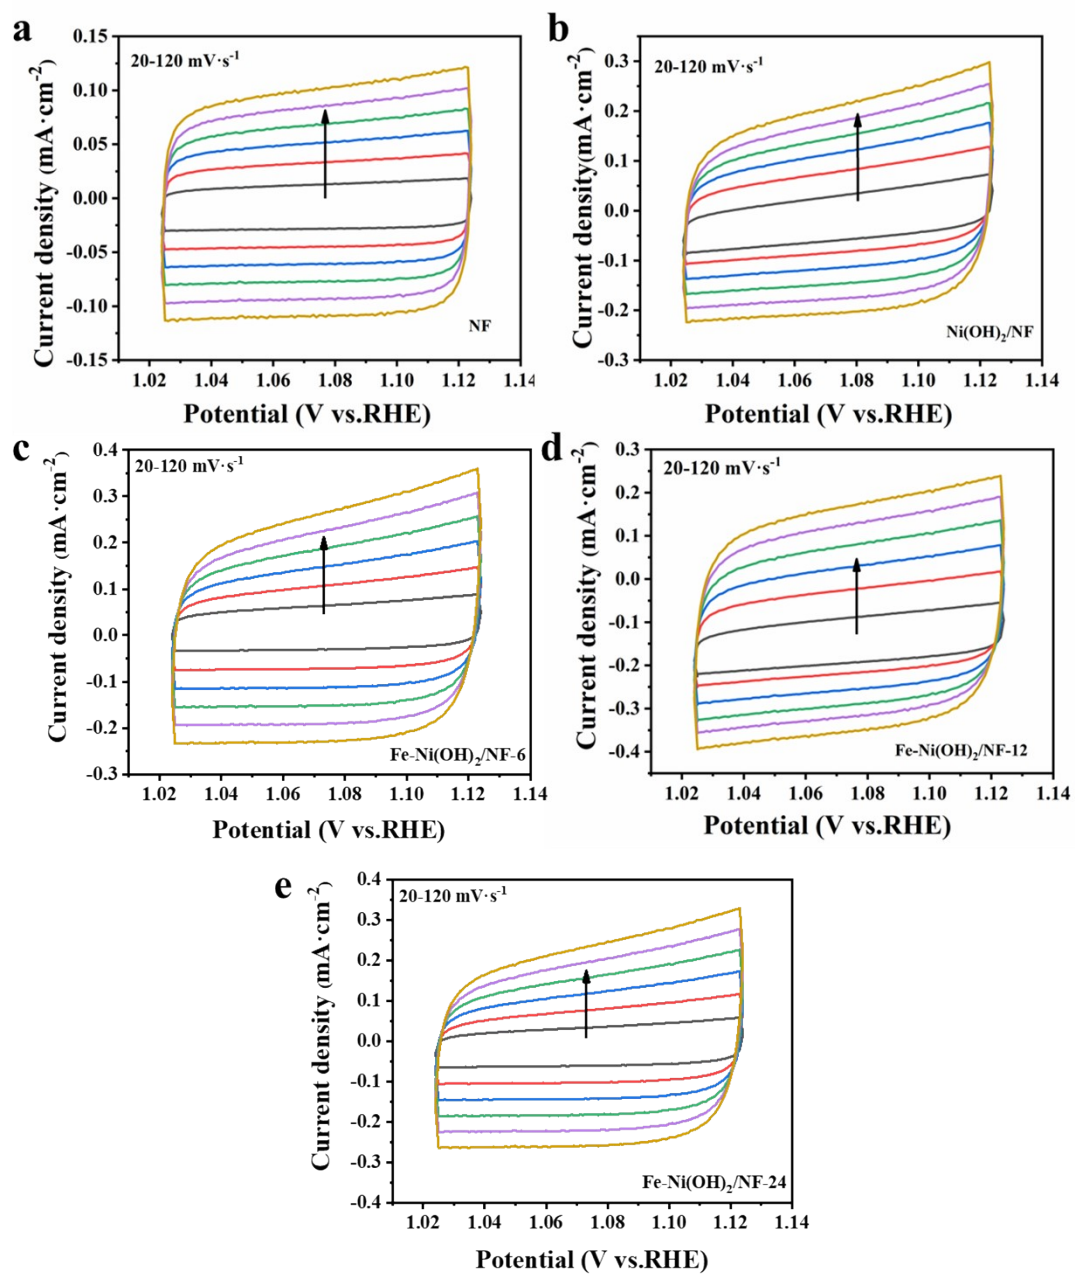

**Fig. S5** (a-e) CV curves of NF, Ni(OH)<sub>2</sub>/NF, Fe-Ni(OH)<sub>2</sub>/NF-6, Fe-Ni(OH)<sub>2</sub>/NF-12 and Fe-Ni(OH)<sub>2</sub>/NF-24 in the double layer region at different scan rates.

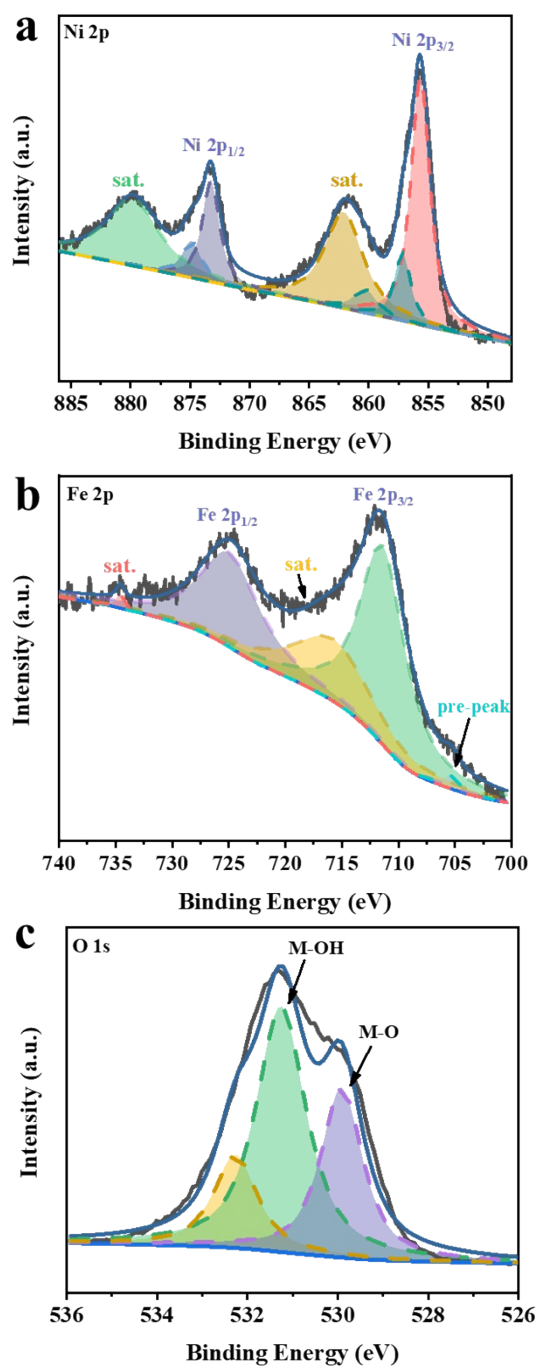

**Fig. S6** The XPS spectra of Ni 2p (a), Fe 2p (b) and O 1s (c) of Fe-Ni(OH)<sub>2</sub>/NF-12 after OER long-term durability test.

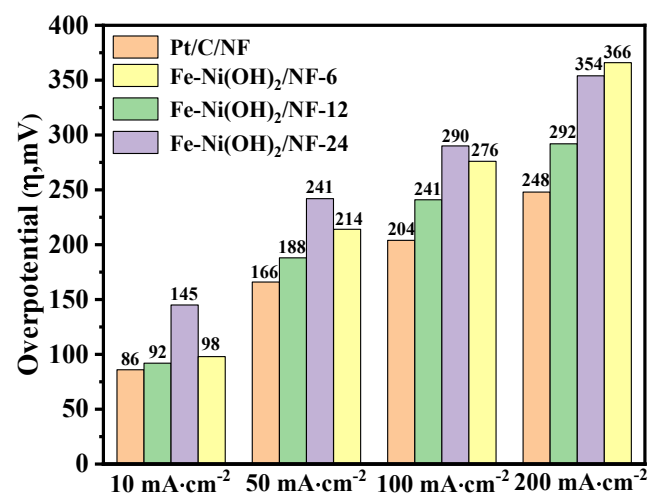

**Fig. S7** Comparison plots of overpotential for HER at 10 mA·cm<sup>-2</sup>, 50 mA·cm<sup>-2</sup>, 100 mA·cm<sup>-2</sup> and 200 mA·cm<sup>-2</sup>.

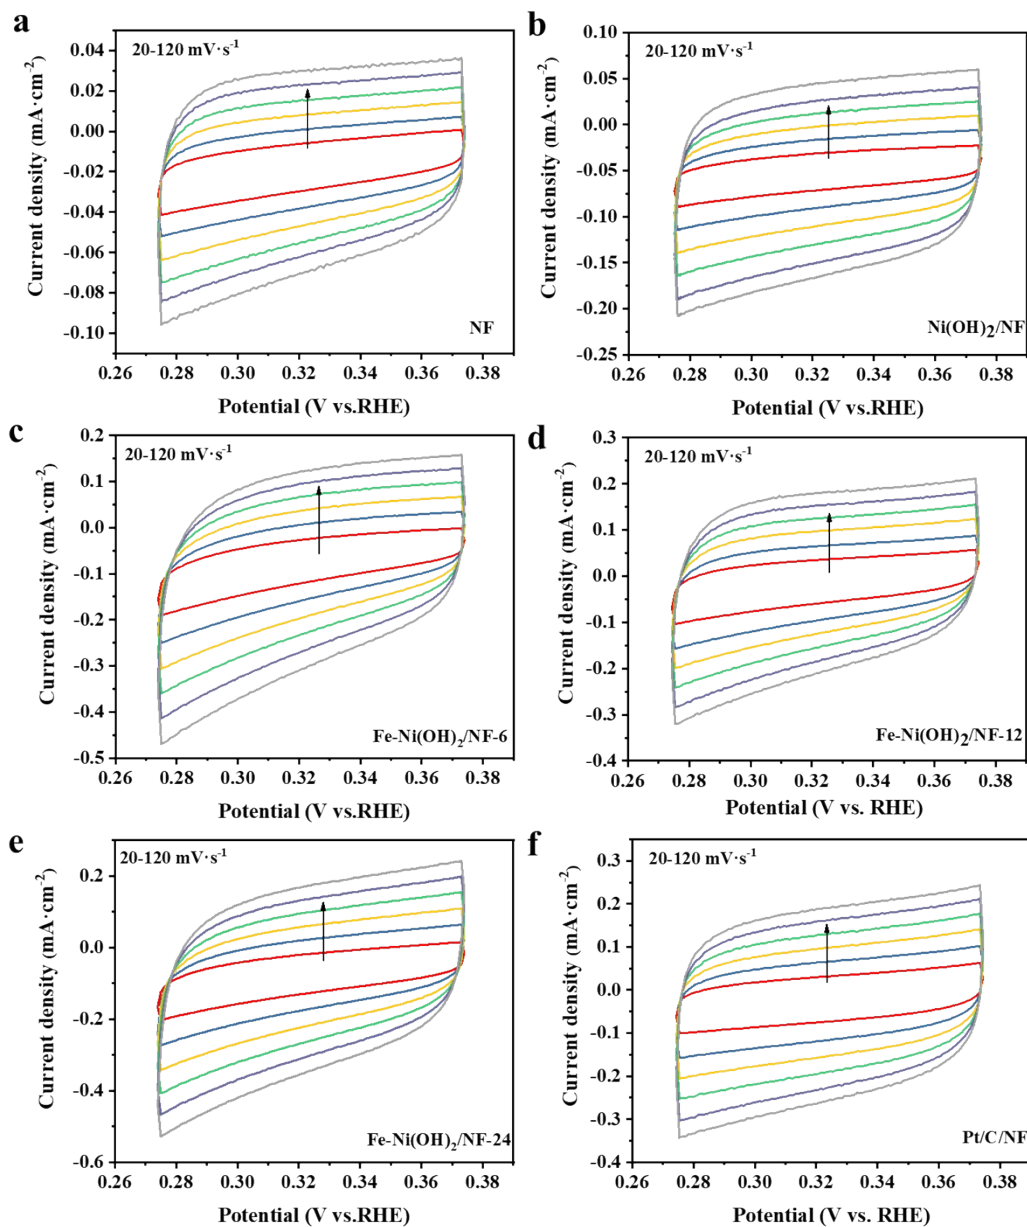

**Fig. S8** (a-f) CV curves of NF, Ni(OH)<sub>2</sub>/NF, Fe-Ni(OH)<sub>2</sub>/NF-6, Fe-Ni(OH)<sub>2</sub>/NF-12, Fe-Ni(OH)<sub>2</sub>/NF-24 and Pt/C/NF in the double layer region at different scan rates.
